# Supplementary material for: DNA structure-specific sensitization of a metalloporphyrin leads to an efficient in vitro quadruplex detection molecular tool
Source: Royal Society of Chemistry journal article supplement (doi:10.1039/c6nj01012a), 2016-01-01
Supplement: c6nj01012a1.pdf [file c6nj01012a1.pdf]

# Supporting Information

## DNA structure-specific sensitization of a metalloporphyrin leads to an efficient *in vitro* quadruplex detection molecular tool

P.-D. Diabate,<sup>a</sup> A. Laguerre,<sup>a</sup> M. Pirrotta,<sup>a</sup> N. Desbois,<sup>a</sup> J. Boudon,<sup>b</sup> C.P. Gros,<sup>a</sup> D. Monchaud<sup>a</sup>

a. Institut de Chimie Moléculaire de l'Université de Bourgogne (ICMUB), CNRS UMR 6302, Université Bourgogne Franche-Comté (UBFC), 21078 Dijon, France.

b. Laboratoire Interdisciplinaire Carnot de Bourgogne (ICB), CNRS UMR 6303, Université Bourgogne Franche-Comté (UBFC), 21078 Dijon, France.

|                                  |         |
|----------------------------------|---------|
| Part 1. Chemistry                | Page S1 |
| Part 2. Dynamic light scattering | Page S3 |
| Part 3. Circular dichroism       | Page S5 |
| Part 4. Oligonucleotides         | Page S6 |
| Part 5. FRET-melting experiments | Page S7 |
| Part 5. UV-Vis and fluorescence  | Page S7 |

### Part 1. Chemistry

**General procedure.** The handling of all air/water sensitive materials was carried out using standard techniques. Unless specified otherwise all other solvents were used as commercially supplied. <sup>1</sup>H NMR spectra were recorded at room temperature on a Bruker Avance II 300; chemical shifts are expressed in ppm relative to MeOD-*d*<sub>4</sub> (3.31 ppm). UV-Vis spectra were recorded in solutions using a Varian Cary 50 spectrophotometer (1 cm path length quartz cell). Accurate mass measurements (HR-MS) were carried out using a LTQ Orbitrap XL (THERMO) mass spectrometer. All measurements were made at the “*Welience, Pôle Chimie Moléculaire de l'Université de Bourgogne (WPCM)*”.

**Synthesis of Pd.TEGPy.** TEGPy (40.0 mg, 26.2 μmol, obtained according to the procedure described in A. Laguerre *et al.*, *Org. Biomol. Chem.*, 2015, **13**, 7034) and PdCl<sub>2</sub> (5.60 mg, 31.6 μmol) were added into 2.0 mL deionized water. The resultant mixture was heated under reflux until the absorbance peak at 426 nm (Soret band of TEGPy in MeOH) blue-shifted to 418 nm (Soret band of Pd.TEGPy in MeOH) without any change afterwards. The mixture was evaporated and purified by size-exclusion chromatography (Bio-rad Bio-Beads S-X1, DMF). The resulting product was passed through a Dowex 1x8 100 mesh ion-exchange column (H<sub>2</sub>O). The title compound was isolated as a red solid in 96% yield (36.6 mg, 25.1 μmol). <sup>1</sup>H NMR (300 MHz, Methanol-*d*<sub>4</sub>) δ 9.39 (d, *J* = 6.3 Hz, 8H, C<sub>3</sub>H<sub>4</sub>N), 9.07 (s, 8H, pyrrole-H), 8.87 (d, *J* = 6.3 Hz, 8H, C<sub>3</sub>H<sub>4</sub>N), 5.12 (m, 8H, CH<sub>2</sub>), 4.24 (m, 8H, CH<sub>2</sub>), 3.80 (m, 8H, CH<sub>2</sub>), 3.67 (m, 8H, CH<sub>2</sub>), 3.61 (m, 8H, CH<sub>2</sub>), 3.45 (m, 8H, CH<sub>2</sub>), 3.11 (s, 12H, OCH<sub>3</sub>). HRMS (ESI): calcd for [C<sub>68</sub>H<sub>86</sub>N<sub>8</sub>O<sub>12</sub>Pd]<sup>3+</sup>, *m/z* = 436.84164, found: 436.84114 ([M-4Cl]<sup>3+</sup>). UV-Vis (MeOH): λ<sub>max</sub> [nm] (ε M<sup>-1</sup>cm<sup>-1</sup>): 418 (52290) 526 (6310), 558 (2770).

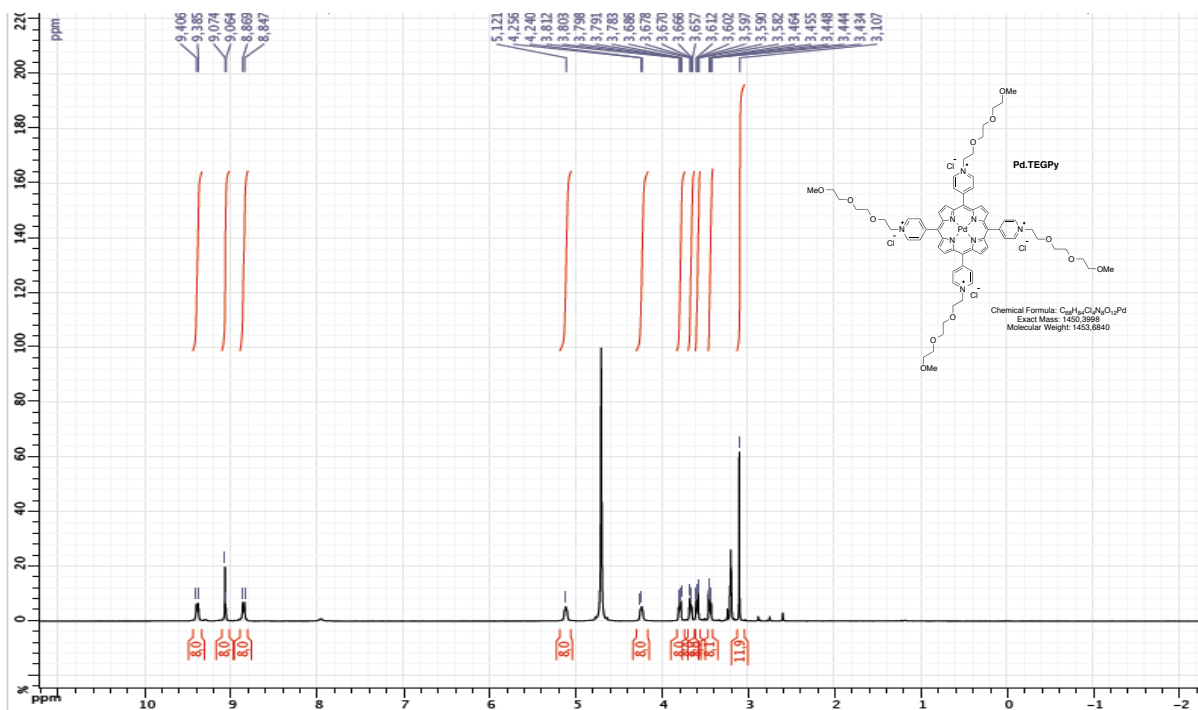

Figure S1.  $^1H$  NMR spectrum of Pd.TEGPy (MeOD, 298K).

C:\Xcalibur\data\15pdd\_2\_me\_1

3/31/2015 4:43:25 PM

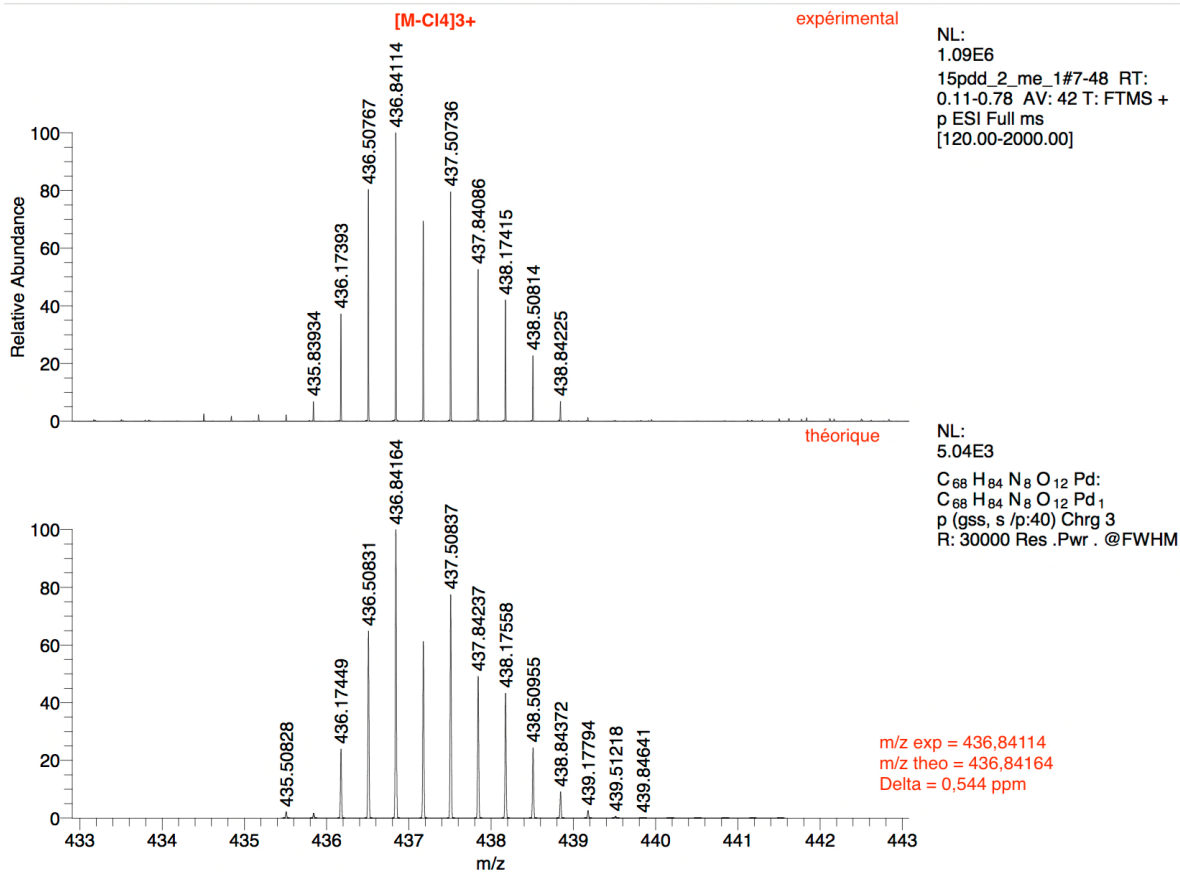

Figure S2. HRMS (ESI) mass spectrum of Pd.TEGPy.

## Part 2. Dynamic light scattering.

a) DLS measurements performed on a Malvern apparatus with 100 $\mu$ M of TMPyP4 in water:

### Sample Details

|                                                              |                                   |
|--------------------------------------------------------------|-----------------------------------|
| <b>Sample Name:</b> TMPyP4 100microM 3                       | <b>SOP Name:</b> mansettings.nano |
| <b>File Name:</b> GATTACA.dts                                | <b>Dispersant Name:</b> Water     |
| <b>Record Number:</b> 47                                     | <b>Dispersant RI:</b> 1,330       |
| <b>Measurement Date and Time:</b> jeudi 21 mai 2015 15:20:18 | <b>Viscosity (cP):</b> 0,8872     |

### System

|                                                          |                                        |
|----------------------------------------------------------|----------------------------------------|
| <b>Temperature (°C):</b> 25,0                            | <b>Duration (s):</b> 10                |
| <b>Count Rate (kcps):</b> 338,0                          | <b>Duration Used (s):</b> 60           |
| <b>Derived Count Rate (kcps):</b> 7681,1                 | <b>Measurement Position (mm):</b> 4,65 |
| <b>Cell Description:</b> Low volume glass cuvette (45... | <b>Attenuator:</b> 8                   |

### Results

|                                               |                      |                       |                    |
|-----------------------------------------------|----------------------|-----------------------|--------------------|
| <b>Z-Average (d.nm):</b> 130,5                | <b>Size (d.nm):</b>  | <b>% by Intensity</b> | <b>% by Volume</b> |
| <b>Pdl:</b> 0,449                             | <b>Peak 1:</b> 336,1 | 100,0                 | 66,8               |
| <b>Intercept:</b> 0,009                       | <b>Peak 2:</b> 0,000 | 0,0                   | 24,5               |
| <b>CPF:</b> 0,00                              | <b>Peak 3:</b> 0,000 | 0,0                   | 8,7                |
| <b>Result quality</b> Refer to quality report |                      |                       |                    |

### Cumulants Analysis Parameters

**First Point:** 3  
**Cut-off:** 0,100

### Multimodal Analysis Parameters

**FirstPoint:** 3  
**Lower Size (d.nm):** 0,6000  
**Upper Size (d.nm):** 6000

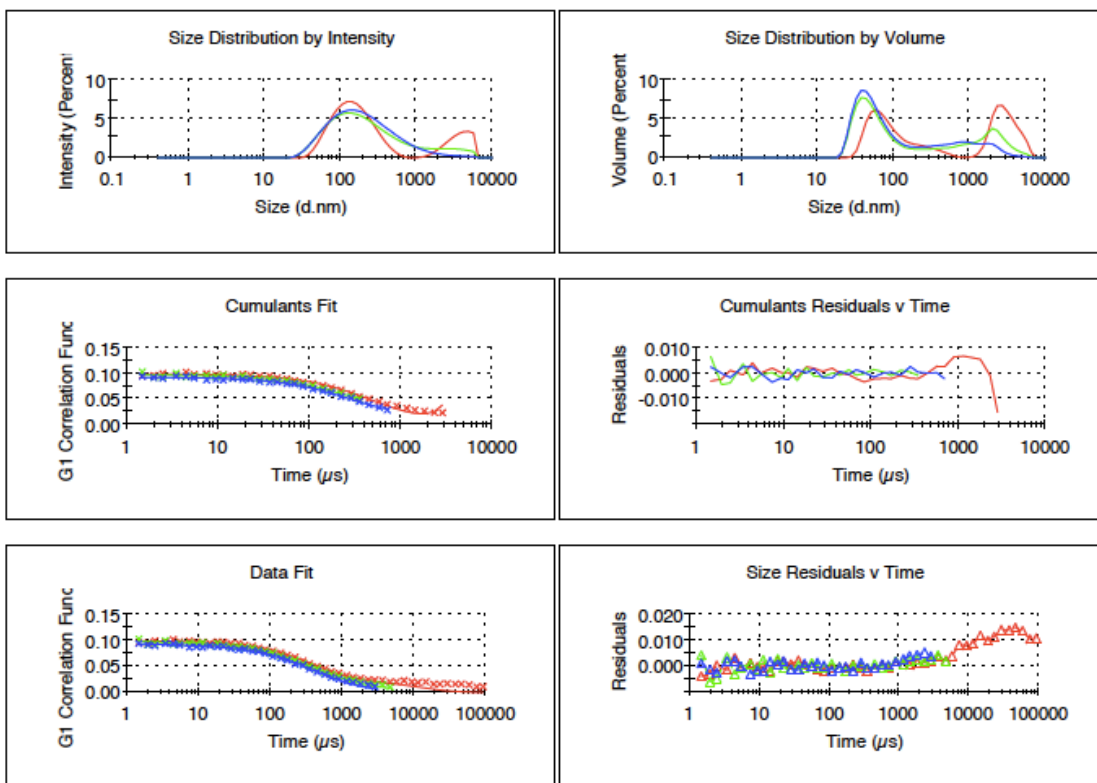

b) DLS measurements performed with 100 $\mu$ M of TEGPy in water:

### Sample Details

|                                                              |                                   |
|--------------------------------------------------------------|-----------------------------------|
| <b>Sample Name:</b> Base libre 100microM 3                   | <b>SOP Name:</b> mansettings.nano |
| <b>File Name:</b> GATTACA.dts                                | <b>Dispersant Name:</b> Water     |
| <b>Record Number:</b> 44                                     | <b>Dispersant RI:</b> 1,330       |
| <b>Measurement Date and Time:</b> jeudi 21 mai 2015 15:13:11 | <b>Viscosity (cP):</b> 0,8872     |

### System

|                                                          |                                        |
|----------------------------------------------------------|----------------------------------------|
| <b>Temperature (°C):</b> 25,0                            | <b>Duration (s):</b> 10                |
| <b>Count Rate (kcps):</b> 263,2                          | <b>Duration Used (s):</b> 70           |
| <b>Derived Count Rate (kcps):</b> 20864,8                | <b>Measurement Position (mm):</b> 4,65 |
| <b>Cell Description:</b> Low volume glass cuvette (45... | <b>Attenuator:</b> 7                   |

### Results

|                                               |                      |                       |                    |
|-----------------------------------------------|----------------------|-----------------------|--------------------|
| <b>Z-Average (d.nm):</b> 670,2                | <b>Size (d.nm):</b>  | <b>% by Intensity</b> | <b>% by Volume</b> |
| <b>Pdl:</b> 0,477                             | <b>Peak 1:</b> 476,3 | 98,2                  | 97,6               |
| <b>Intercept:</b> 0,338                       | <b>Peak 2:</b> 5560  | 1,8                   | 2,4                |
| <b>CPF:</b> 0,00                              | <b>Peak 3:</b> 0,000 | 0,0                   | 0,0                |
| <b>Result quality</b> Refer to quality report |                      |                       |                    |

### Cumulants Analysis Parameters

**First Point:** 3  
**Cut-off:** 0,100

### Multimodal Analysis Parameters

**FirstPoint:** 3  
**Lower Size (d.nm):** 0,6000  
**Upper Size (d.nm):** 6000

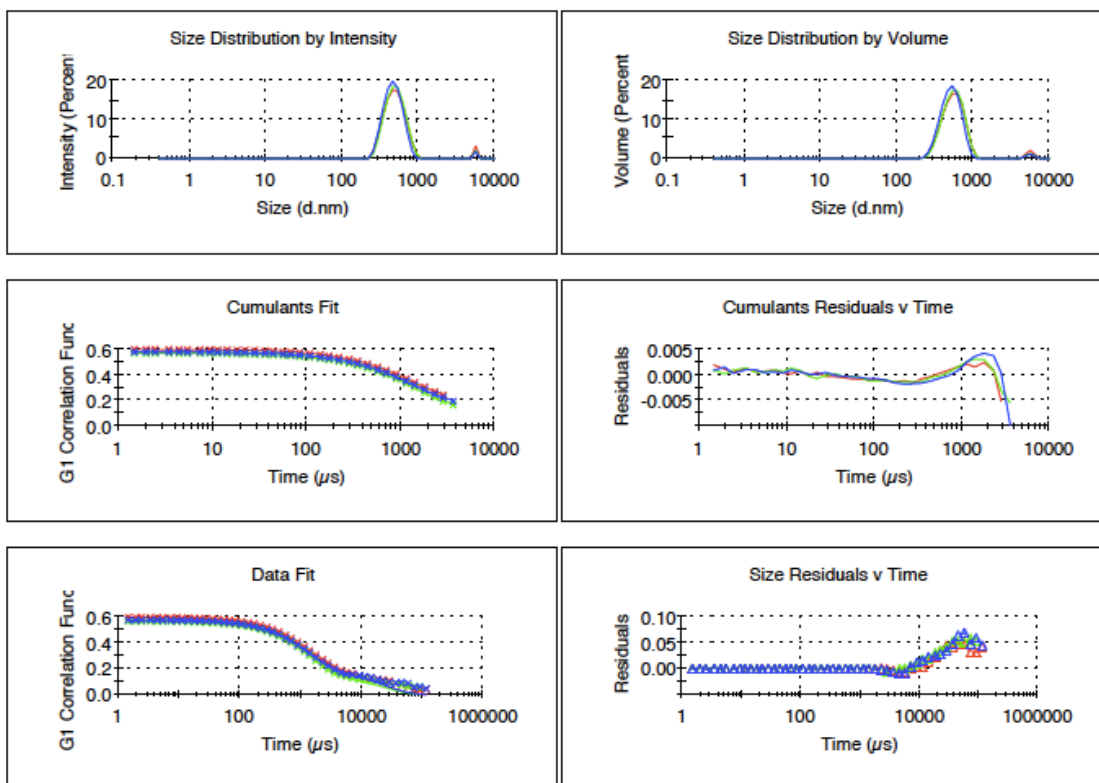

c) DLS measurements performed with 100 $\mu$ M of Pd.TEGPy in water:

### Sample Details

|                                                              |                                   |
|--------------------------------------------------------------|-----------------------------------|
| <b>Sample Name:</b> TEGPy Palladium 100microM 3              | <b>SOP Name:</b> mansettings.nano |
| <b>File Name:</b> GATTACA.dts                                | <b>Dispersant Name:</b> Water     |
| <b>Record Number:</b> 66                                     | <b>Dispersant RI:</b> 1,330       |
| <b>Measurement Date and Time:</b> jeudi 21 mai 2015 16:14:26 | <b>Viscosity (cP):</b> 0,8872     |

### System

|                                                          |                                        |
|----------------------------------------------------------|----------------------------------------|
| <b>Temperature (°C):</b> 25,0                            | <b>Duration (s):</b> 10                |
| <b>Count Rate (kcps):</b> 270,4                          | <b>Duration Used (s):</b> 60           |
| <b>Derived Count Rate (kcps):</b> 2436,3                 | <b>Measurement Position (mm):</b> 4,65 |
| <b>Cell Description:</b> Low volume glass cuvette (45... | <b>Attenuator:</b> 9                   |

### Results

|                                |                      |                       |                    |
|--------------------------------|----------------------|-----------------------|--------------------|
| <b>Z-Average (d.nm):</b> 145,1 | <b>Size (d.nm):</b>  | <b>% by Intensity</b> | <b>% by Volume</b> |
| <b>Pdl:</b> 0,374              | <b>Peak 1:</b> 195,4 | 96,4                  | 44,9               |
| <b>Intercept:</b> 0,706        | <b>Peak 2:</b> 4976  | 2,6                   | 39,2               |
| <b>CPF:</b> 0,00               | <b>Peak 3:</b> 19,44 | 0,9                   | 14,0               |
| <b>Result quality</b> Good     |                      |                       |                    |

### Cumulants Analysis Parameters

**First Point:** 3  
**Cut-off:** 0,100

### Multimodal Analysis Parameters

**FirstPoint:** 3  
**Lower Size (d.nm):** 0,6000  
**Upper Size (d.nm):** 6000

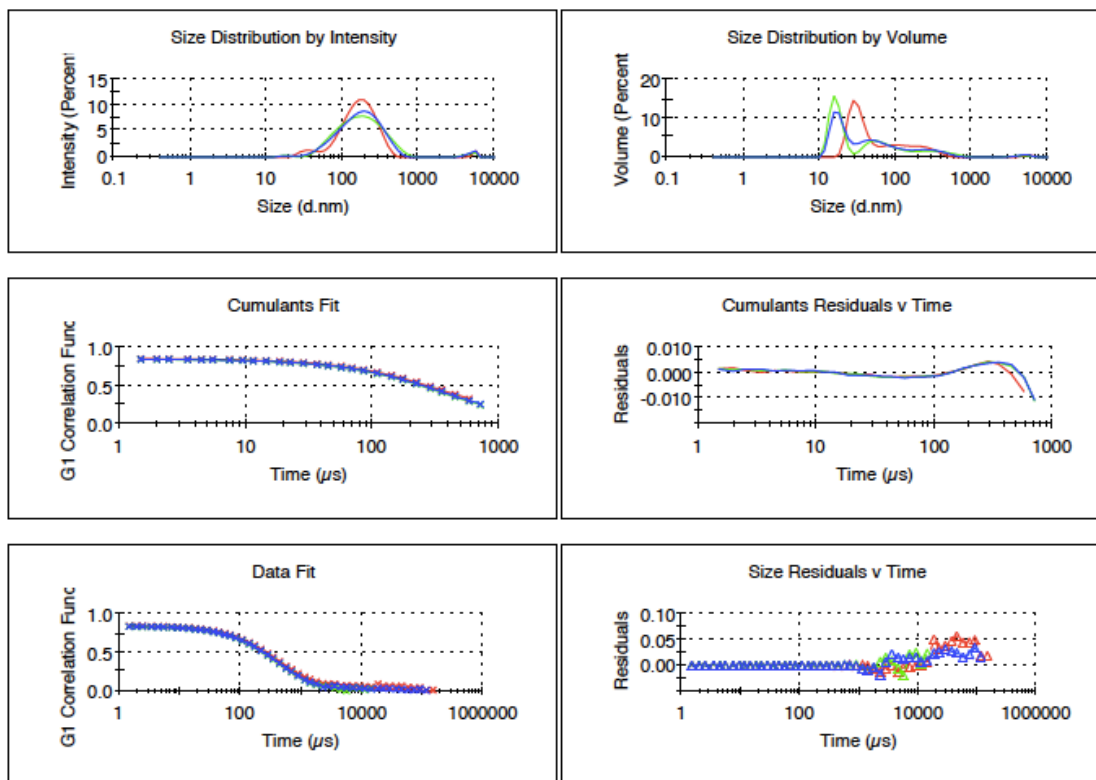

### Part 3. Circular dichroism spectroscopy.

CD spectra were recorded on a JASCO J-815 spectropolarimeter in a 10mm path-length quartz semi-micro cuvette (Starna). CD spectra were recorded over a range of 500-600nm (bandwidth =

3nm, 1nm pitch, 1s response, scan speed = 500nm.mn<sup>-1</sup>, averaged over 3 scans, zeroed at 600nm) with 100μM of TEGPy, Pd.TEGPy and TMPyP4 in water. Final data were analyzed with OriginPro<sup>®</sup>8 (OriginLab Corp.).

#### Part 4. Oligonucleotides.

**Preparation of stock solutions.** The lyophilized DNA/RNA strands (purchased from Eurogentec, Seraing, Belgium) were firstly diluted in deionized water (18.2 MΩ.cm resistivity) at 500μM for monomolecular (*i.e.*, F21T, F-DS-T, L-TERRA, 22AG, c-myc, c-kit,) and bimolecular structures (*i.e.*, ds17 and ds26) or 1000μM for tetramolecular structures, (*i.e.*, TG5T). All DNA structures were prepared in a Caco.K buffer, comprised of 10mM lithium cacodylate buffer (pH 7.2) plus 10mM KCl/90mM LiCl. Monomolecular structures were prepared by mixing 40μL of the constitutive strand (500μM) with 8μL of a lithium cacodylate buffer solution (100mM, pH 7.2), plus 8μL of a KCl/LiCl solution (100mM/900mM) and 24μL of water. Bimolecular structures were prepared by mixing 40μL of each constitutive strand (500μM) with 16μL of a lithium cacodylate buffer solution (100mM, pH 7.2), plus 16μL of a KCl/LiCl solution (100mM/900mM) and 48μL of water. Tetramolecular structures were prepared by mixing 20μL of each constitutive strand (1000μM) with 32μL of a lithium cacodylate buffer solution (100mM, pH 7.2), plus 32μL of a KCl/LiCl solution (100mM/900mM) and 96μL of water. The final concentrations were theoretically 250, 125 and 83.3μM respectively for mono-, bi- and tetra-molecular DNA structures, respectively.

| Name    | Sequence                                                                                                                                    |
|---------|---------------------------------------------------------------------------------------------------------------------------------------------|
| F21T    | FAM-d[ <sup>5'</sup> GGGTTAGGGTTAGGGTTAGGG <sup>3'</sup> ]-TAMRA                                                                            |
| F-DS-T  | FAM-d[ <sup>5'</sup> TATAGCTATATTTTTTTATAGCTATA <sup>3'</sup> ]-TAMRA                                                                       |
| L-TERRA | FAM-r[ <sup>5'</sup> GGGUUAGGGUUAGGGUUAGGG <sup>3'</sup> ]-TAMRA                                                                            |
| 22AG    | d[ <sup>5'</sup> AGGGTTAGGGTTAGGGTTAGGG <sup>3'</sup> ]                                                                                     |
| c-myc   | d[ <sup>5'</sup> GAGGGTGGGGAGGGTGGGGAAG <sup>3'</sup> ]                                                                                     |
| c-kit   | d[ <sup>5'</sup> CGGGCGGGCGCGAGGGAGGGG <sup>3'</sup> ]                                                                                      |
| TG5T    | <i>strands 1-4</i> : d[ <sup>5'</sup> TGGGGGT <sup>3'</sup> ]                                                                               |
| ds17    | <i>strand 1</i> : d[ <sup>5'</sup> CCAGTTCGTAGTAACCC <sup>3'</sup> ]<br><i>strand 2</i> : d[ <sup>5'</sup> GGGTACTACGAAGTGG <sup>3'</sup> ] |
| ds26    | <i>strand 1-2</i> : d[ <sup>5'</sup> CAATCGGATCGAATTCGATCCGATTG <sup>3'</sup> ]                                                             |

The actual concentration of each DNA was determined through a dilution to 1μM theoretical concentration (expressed in motif concentration) for monomolecular structures (*i.e.*, 4μL in 996μL water), to 1μM for bimolecular structures (*i.e.*, 8μL in 992μL water) and to 0.2μM for tetramolecular structure (*i.e.*, 2.4μL in 997.6μL water) through UV spectral analysis at 260nm (after 5min at 90°C) with the following molar extinction coefficient values: 268300 (F21T), 258900 (F-ds-T), 276700 (L-TERRA), 228500 (22AG), 232000 (c-myc), 205600 (c-kit), 271600 (TG5T), 328300 (ds17) and 506400 M<sup>-1</sup>.cm<sup>-1</sup> (ds26).

**Folding of higher-order structures.** The higher-order DNA/RNA structures were folded according to two procedures: (a) for the monomolecular architectures, solutions were heated (90°C, 5 min), cooled on ice (7hrs) and then stored at least overnight (4°C); (b) for the folding of all other

structures, the solutions were heated (90°C, 5min), gradually cooled (65, 60, 55, 50, 40 and 30°C (60mn/step), 25°C (2hr)) and then stored at least overnight (4°C).

### Part 5. FRET-melting experiments.

Experiments were performed in a 96-well format using a Mx3005P qPCR machine (Agilent) equipped with a FAM filter ( $\lambda_{\text{ex}} = 492\text{nm}$ ;  $\lambda_{\text{em}} = 516\text{nm}$ ) in 100 $\mu\text{L}$  (final volume) of 10mM lithium cacodylate buffer (pH 7.2) + 99mM LiCl/1mM KCl for L-TERRA and + 90mM LiCl/10mM KCl for F21T and F-DS-T, with 0.2 $\mu\text{M}$  of labeled oligonucleotide and 5 equiv. of ligands (TMPyP4, TEGPy and Pd.TEGPy). Competitive experiments were carried out with labeled oligonucleotide (0.2 $\mu\text{M}$ ), 5 equiv. ligands (TMPyP4, TEGPy and Pd.TEGPy) and increasing amounts (0, 15 and 50 equiv.) of the unlabeled competitor ds26. After a first equilibration step (25°C, 30s), a stepwise increase of 1°C every 30s for 65 cycles to reach 90°C was performed, and measurements were made after each cycle. Final data were analyzed with Excel (Microsoft Corp.) and OriginPro<sup>®</sup>8 (OriginLab Corp.). The emission of FAM was normalized (0 to 1), and  $T_{1/2}$  was defined as the temperature for which the normalized emission is 0.5;  $\Delta T_{1/2}$  values are means of 3 experiments.

### Part 6. Fluorescence and UV-Vis investigations.

UV-Vis spectra were recorded on a JASCO V630Bio and fluorescence spectra on a JASCO FP8500 in a 10mm path-length quartz semi-micro cuvette (Starna). UV-Vis experiments were carried out in 1mL (final volume) of 10mM lithium cacodylate buffer (pH 7.2) + 90mM LiCl/10mM KCl, with ligands (TMPyP4, TEGPy and Pd.TEGPy, 2 $\mu\text{M}$ ) alone and in presence of TG5T (up to 20 $\mu\text{M}$ ).

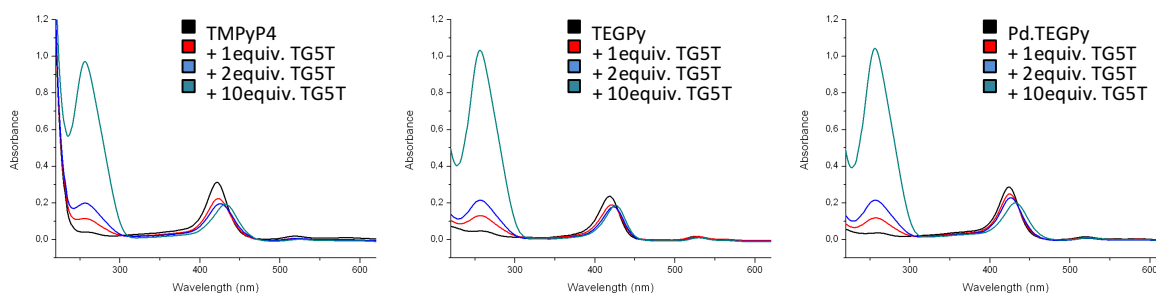

**Figure S3.** UV-Vis titrations of TMPyP4, TEGPy and Pd.TEGPy with increasing amounts (1, 2 and 10 equiv.) of TG5T.

Fluorescence experiments were carried out in 1mL (final volume) of 10mM lithium cacodylate buffer (pH 7.2) + 90mM LiCl/10mM KCl, with ligands (TMPyP4, TEGPy and Pd.TEGPy, 2 $\mu\text{M}$ ) alone and in presence of DNA oligonucleotides (up to 20 $\mu\text{M}$ ) being either duplexes (ds17, ds26) or quadruplexes (22AG, myc, kit and TG5T). Spectra ( $\lambda_{\text{ex}} = 256\text{nm}$ ,  $\lambda_{\text{em}} = 425\text{--}625\text{nm}$ , Ex and Em slits = 5nm, 1nm pitch, 1s response, scan speed = 500nm.mn<sup>-1</sup>) were recorded 5mn (at 25°C) after the addition of the oligonucleotides.

DNA-sensitizing experiments were carried out in 1mL (final volume) of 10mM lithium cacodylate buffer (pH 7.2) + 90mM LiCl/10mM KCl, ligands (TMPyP4, TEGPy and Pd.TEGPy, 2 $\mu\text{M}$ ) in presence of oligonucleotides (TG5T or ds26, 20 $\mu\text{M}$ ). Spectra were recorded at 15 different  $\lambda_{\text{ex}}$  between 226 and 306nm (Ex and Em slits = 5nm, 1nm pitch, 1s response, scan speed = 500nm.mn<sup>-1</sup>) at 25°C.



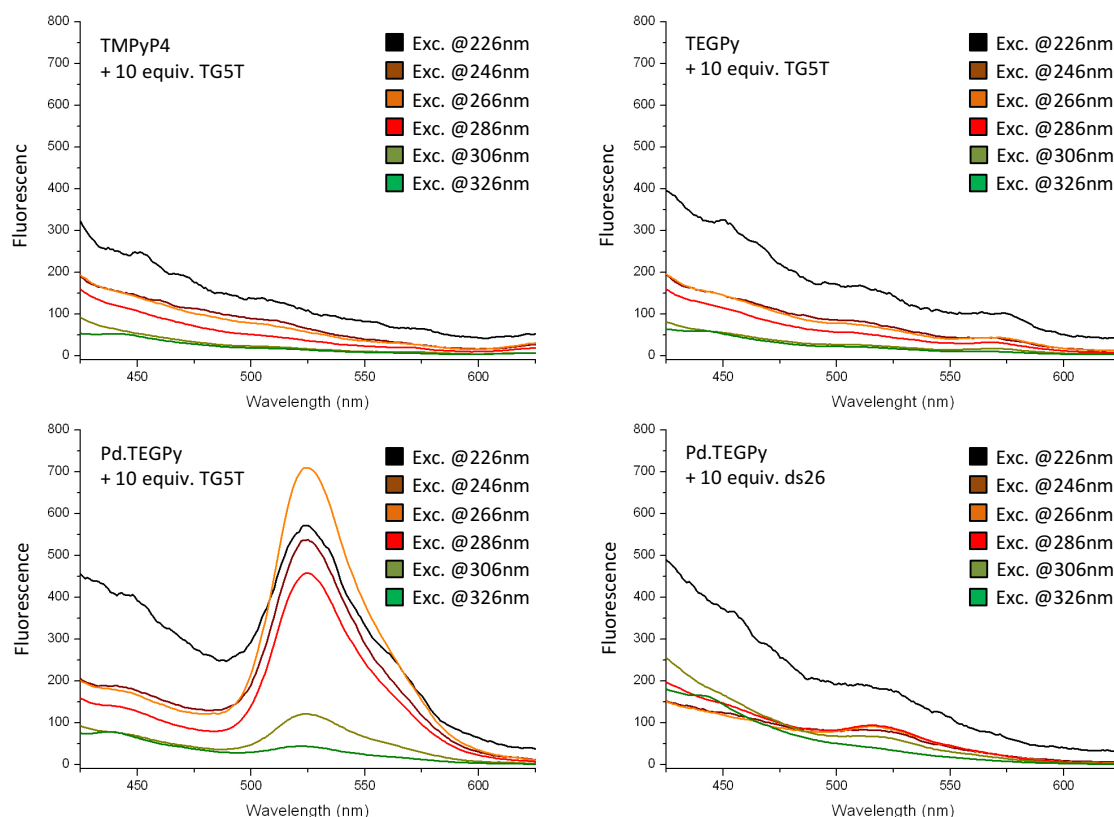

**Figure S4.** DNA-mediated fluorescence experiments carried out with TMPyP4, TEGPy and Pd.TEGPy and 10 equiv. of TG5T or ds26 at various  $\lambda_{\text{ex}}$  between 226 and 306nm.

Control experiment for the screening effect described in Figure 6B of the main manuscript: experiments were carried out in 1mL (final volume) of 10mM lithium cacodylate buffer (pH 7.2) + 90mM LiCl/10mM KCl, with Pd.TEGPy (2 $\mu$ M) in presence of an excess of 22AG (up to 20 $\mu$ M). Spectra ( $\lambda_{\text{ex}}$  = 256nm,  $\lambda_{\text{em}}$  = 518nm, Ex and Em slits = 5nm, 1nm pitch, 1s response, scan speed = 500nm.mn<sup>-1</sup>) were recorded 5mn (at 25°C) after the addition of every 2 $\mu$ M of 22AG.

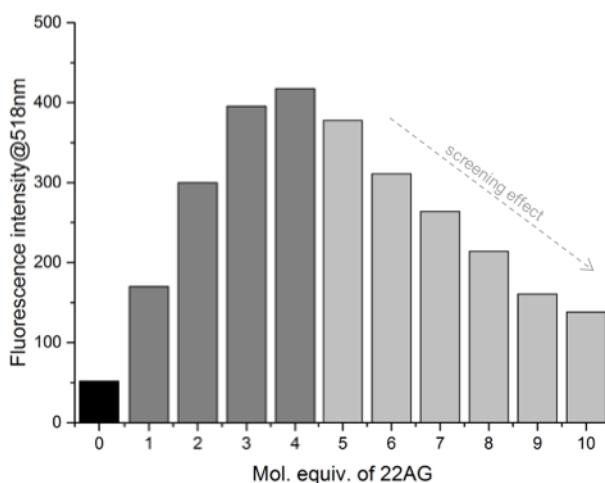

**Figure S5.** Figure S5. Fluorescence titrations ( $\lambda_{\text{ex}}$  = 256nm) of 2 $\mu$ M Pd.TEGPy upon addition of increasing amounts of 22AG (0 to 20 $\mu$ M, 2 $\mu$ M-step), carried out in lithium cacodylate buffer (pH 7.2) plus 10mM KCl/90mM LiCl.
